# Supplementary material for: Clustering of cardiovascular behavioral risk factors and blood pressure among people diagnosed with hypertension: a nationally representative survey in China
Source: PubMed Central journal article supplement (PMC4899782; doi:10.1038/srep27627), 2016-06-09
Supplement: srep27627-s1.pdf [file srep27627-s1.pdf]

**Article title: Clustering of cardiovascular behavioral risk factors and blood pressure among people diagnosed with hypertension: a nationally representative survey in China**

Author list: Yichong Li, Xiaoqi Feng, Mei Zhang, Maigeng Zhou, Ning Wang, Limin Wang

**Supplementary Table. Effects of each covariates on BP levels and accumulative ORs in the generalized proportional odds models by sex.**

|                                                                         | ≥level 6 BP <sup>a</sup> |                 |          | ≥level 5 BP            |                 |          |
|-------------------------------------------------------------------------|--------------------------|-----------------|----------|------------------------|-----------------|----------|
|                                                                         | Regression coefficient   | OR (%95 CI)     | <i>P</i> | Regression coefficient | OR (%95 CI)     | <i>P</i> |
| Men                                                                     |                          |                 |          |                        |                 |          |
| Education (reference: Illiterate or semi-illiterate)                    |                          |                 |          |                        |                 |          |
| College graduate or above                                               | -0.87                    | 0.42(0.30,0.59) | <0.01    | -0.50                  | 0.61(0.50,0.73) | <0.01    |
| Senior high school graduate or some college                             | -0.24                    | 0.79(0.65,0.96) | 0.02     | -0.15                  | 0.86(0.75,0.98) | 0.02     |
| Junior high school graduate or some senior high school                  | -0.28                    | 0.76(0.64,0.89) | <0.01    | -0.11                  | 0.89(0.80,0.99) | 0.04     |
| Primary school graduate or some junior high school                      | -0.25                    | 0.78(0.66,0.92) | <0.01    | -0.04                  | 0.96(0.86,1.07) | 0.46     |
| Marital status (reference: single)                                      |                          |                 |          |                        |                 |          |
| Married or cohabiting                                                   | -0.05                    | 0.95(0.63,1.43) | 0.81     | -0.02                  | 0.98(0.74,1.29) | 0.87     |
| Separated/divorced/widowed/others                                       | 0.07                     | 1.07(0.69,1.66) | 0.76     | 0.01                   | 1.01(0.75,1.36) | 0.93     |
| Age (reference: 18-24 years)                                            |                          |                 |          |                        |                 |          |
| 35-44 years                                                             | 0.10                     | 1.10(0.71,1.72) | 0.66     | -0.00                  | 1.00(0.75,1.32) | 0.98     |
| 45-54 years                                                             | -0.06                    | 0.94(0.62,1.43) | 0.77     | 0.01                   | 1.01(0.77,1.32) | 0.96     |
| 55-64 years                                                             | -0.13                    | 0.88(0.58,1.33) | 0.55     | -0.02                  | 0.98(0.75,1.28) | 0.88     |
| 65-74 years                                                             | 0.02                     | 1.02(0.67,1.55) | 0.92     | 0.10                   | 1.11(0.85,1.45) | 0.46     |
| 75+ years                                                               | 0.12                     | 1.12(0.72,1.75) | 0.61     | 0.19                   | 1.21(0.91,1.61) | 0.20     |
| Location (reference: rural areas)                                       |                          |                 |          |                        |                 |          |
| Urban areas                                                             | -0.19                    | 0.83(0.73,0.94) | <0.01    | -0.19                  | 0.83(0.76,0.90) | <0.01    |
| Annual per capita household income (reference: >5372 US\$) <sup>b</sup> |                          |                 |          |                        |                 |          |
| Don't know/not sure/refused                                             | 0.28                     | 1.33(1.11,1.60) | <0.01    | 0.29                   | 1.34(1.19,1.50) | <0.01    |
| < 895                                                                   | 0.29                     | 1.33(1.10,1.62) | <0.01    | 0.29                   | 1.33(1.18,1.51) | <0.01    |
| 895-1789                                                                | 0.12                     | 1.13(0.91,1.40) | 0.28     | 0.21                   | 1.23(1.07,1.41) | <0.01    |
| 1790-5372                                                               | 0.17                     | 1.18(0.98,1.43) | <0.01    | 0.17                   | 1.19(1.06,1.33) | <0.01    |
| Antihypertensive medication in the last 2 weeks (reference: no)         |                          |                 |          |                        |                 |          |
| Yes                                                                     | -0.28                    | 0.76(0.67,0.86) | <0.01    | -0.27                  | 0.77(0.70,0.83) | <0.01    |
| Number of risk factors                                                  | 0.09                     | 1.09(1.03,1.15) | <0.01    | 0.08                   | 1.08(1.04,1.12) | <0.01    |

a: Blood pressure level: level 1 (SBP < 120 mmHg and DBP < 80 mmHg); level 2 (SBP: 120-129 mmHg and/or DBP: 80-84 mmHg); level 3 (SBP: 130-139 mmHg and/or DBP: 85-89 mmHg); level 4 (SBP: 140-159 mmHg and/or DBP: 90-99 mmHg); level 5 (SBP: 160-179 mmHg and/or DBP: 100-109 mmHg); level 6 (SBP > 180 mmHg and/or DBP > 110 mmHg)

b: Based on the exchange rate of 6.70 Chinese Yuan Renminbi per US dollar that was in effect on 30 September 2010.

Table continued.

|                                                                         | ≥level 6 BP <sup>a</sup> |                 |       | ≥level 5 BP            |                 |       |
|-------------------------------------------------------------------------|--------------------------|-----------------|-------|------------------------|-----------------|-------|
|                                                                         | Regression coefficient   | OR (%95 CI)     | P     | Regression coefficient | OR (%95 CI)     | P     |
| Women                                                                   |                          |                 |       |                        |                 |       |
| Education (reference: Illiterate or semi-illiterate)                    |                          |                 |       |                        |                 |       |
| College graduate or above                                               | -0.77                    | 0.46(0.30,0.73) | <0.01 | -0.94                  | 0.39(0.30,0.51) | <0.01 |
| Senior high school graduate or some college                             | -0.69                    | 0.50(0.40,0.62) | <0.01 | -0.45                  | 0.64(0.56,0.72) | <0.01 |
| Junior high school graduate or some senior high school                  | -0.31                    | 0.74(0.64,0.84) | <0.01 | -0.27                  | 0.76(0.70,0.83) | <0.01 |
| Primary school graduate or some junior high school                      | -0.06                    | 0.94(0.83,1.06) | 0.33  | -0.08                  | 0.92(0.85,1.00) | 0.06  |
| Marital status (reference: single)                                      |                          |                 |       |                        |                 |       |
| Married or cohabiting                                                   | -0.05                    | 0.95(0.50,1.82) | 0.88  | 0.01                   | 1.01(0.65,1.57) | 0.97  |
| Separated/divorced/widowed/others                                       | -0.12                    | 0.88(0.46,1.70) | 0.71  | -0.06                  | 0.95(0.61,1.48) | 0.81  |
| Age (reference: 18-24 years)                                            |                          |                 |       |                        |                 |       |
| 35-44 years                                                             | -0.22                    | 0.80(0.50,1.28) | 0.35  | -0.03                  | 0.98(0.71,1.34) | 0.88  |
| 45-54 years                                                             | -0.15                    | 0.86(0.55,1.34) | 0.50  | -0.09                  | 0.91(0.68,1.23) | 0.55  |
| 55-64 years                                                             | -0.30                    | 0.74(0.48,1.15) | 0.18  | -0.14                  | 0.87(0.64,1.17) | 0.35  |
| 65-74 years                                                             | 0.03                     | 1.03(0.66,1.60) | 0.90  | 0.03                   | 1.03(0.76,1.39) | 0.87  |
| 75+ years                                                               | 0.18                     | 1.20(0.76,1.89) | 0.44  | 0.22                   | 1.25(0.91,1.71) | 0.17  |
| Location (reference: rural areas)                                       |                          |                 |       |                        |                 |       |
| Urban areas                                                             | -0.40                    | 0.67(0.61,0.74) | <0.01 | -0.27                  | 0.77(0.71,0.82) | <0.01 |
| Annual per capita household income (reference: >5372 US\$) <sup>b</sup> |                          |                 |       |                        |                 |       |
| Don't know/not sure/refused                                             | 0.43                     | 1.54(1.30,1.81) | <0.01 | 0.29                   | 1.33(1.21,1.47) | <0.01 |
| < 895                                                                   | 0.47                     | 1.60(1.35,1.91) | <0.01 | 0.31                   | 1.37(1.23,1.53) | <0.01 |
| 895-1789                                                                | 0.48                     | 1.62(1.35,1.96) | <0.01 | 0.26                   | 1.30(1.15,1.46) | <0.01 |
| 1790-5372                                                               | 0.28                     | 1.33(1.12,1.58) | <0.01 | 0.17                   | 1.18(1.07,1.31) | <0.01 |
| Antihypertensive medication in the last 2 weeks (reference: no)         |                          |                 |       |                        |                 |       |
| Yes                                                                     | -0.07                    | 0.94(0.84,1.05) | 0.24  | -0.09                  | 0.91(0.85,0.98) | 0.02  |
| Number of risk factors                                                  | 0.11                     | 1.12(1.05,1.18) | <0.01 | 0.11                   | 1.12(1.05,1.18) | <0.01 |

a: Blood pressure level: level 1 (SBP < 120 mmHg and DBP < 80 mmHg); level 2 (SBP: 120-129 mmHg and/or DBP: 80-84 mmHg); level 3 (SBP: 130-139 mmHg and/or DBP: 85-89 mmHg); level 4 (SBP: 140-159 mmHg and/or DBP: 90-99 mmHg); level 5 (SBP: 160-179 mmHg and/or DBP: 100-109 mmHg); level 6 (SBP > 180 mmHg and/or DBP > 110 mmHg)

b: Based on the exchange rate of 6.70 Chinese Yuan Renminbi per US dollar that was in effect on 30 September 2010.

Table continued.

|                                                                         | ≥level 4 BP <sup>a</sup> |                 |       | ≥level 3 BP            |                 |       |
|-------------------------------------------------------------------------|--------------------------|-----------------|-------|------------------------|-----------------|-------|
|                                                                         | Regression coefficient   | OR (%95 CI)     | P     | Regression coefficient | OR (%95 CI)     | P     |
| Men                                                                     |                          |                 |       |                        |                 |       |
| Education (reference: Illiterate or semi-illiterate)                    |                          |                 |       |                        |                 |       |
| College graduate or above                                               | -0.32                    | 0.73(0.61,0.86) | <0.01 | -0.17                  | 0.85(0.68,1.06) | 0.14  |
| Senior high school graduate or some college                             | -0.08                    | 0.92(0.81,1.05) | 0.22  | 0.03                   | 1.03(0.86,1.23) | 0.75  |
| Junior high school graduate or some senior high school                  | 0.02                     | 1.02(0.91,1.15) | 0.71  | 0.15                   | 1.16(0.99,1.35) | 0.06  |
| Primary school graduate or some junior high school                      | 0.08                     | 1.08(0.96,1.22) | 0.19  | 0.20                   | 1.22(1.04,1.43) | 0.01  |
| Marital status (reference: single)                                      |                          |                 |       |                        |                 |       |
| Married or cohabiting                                                   | 0.00                     | 1.00(0.75,1.34) | 1.00  | -0.16                  | 0.85(0.57,1.27) | 0.43  |
| Separated/divorced/widowed/others                                       | 0.04                     | 1.04(0.76,1.42) | 0.82  | -0.10                  | 0.90(0.58,1.39) | 0.64  |
| Age (reference: 18-24 years)                                            |                          |                 |       |                        |                 |       |
| 35-44 years                                                             | 0.14                     | 1.16(0.87,1.53) | 0.31  | -0.17                  | 0.85(0.58,1.24) | 0.39  |
| 45-54 years                                                             | 0.21                     | 1.23(0.95,1.60) | 0.11  | -0.06                  | 0.94(0.66,1.35) | 0.75  |
| 55-64 years                                                             | 0.26                     | 1.30(1.00,1.68) | 0.05  | 0.01                   | 1.01(0.71,1.44) | 0.94  |
| 65-74 years                                                             | 0.31                     | 1.36(1.04,1.77) | 0.02  | 0.07                   | 1.07(0.75,1.54) | 0.71  |
| 75+ years                                                               | 0.44                     | 1.55(1.17,2.06) | 0.00  | 0.20                   | 1.23(0.83,1.81) | 0.31  |
| Location (reference: rural areas)                                       |                          |                 |       |                        |                 |       |
| Urban areas                                                             | -0.14                    | 0.87(0.80,0.95) | <0.01 | -0.15                  | 0.86(0.77,0.97) | 0.01  |
| Annual per capita household income (reference: >5372 US\$) <sup>b</sup> |                          |                 |       |                        |                 |       |
| Don't know/not sure/refused                                             | 0.18                     | 1.20(1.07,1.34) | <0.01 | 0.11                   | 1.11(0.96,1.30) | 0.16  |
| < 895                                                                   | 0.19                     | 1.21(1.06,1.37) | <0.01 | 0.04                   | 1.04(0.88,1.23) | 0.66  |
| 895-1789                                                                | 0.20                     | 1.22(1.06,1.40) | <0.01 | 0.17                   | 1.18(0.98,1.43) | 0.08  |
| 1790-5372                                                               | 0.14                     | 1.15(1.03,1.29) | 0.01  | 0.19                   | 1.21(1.04,1.40) | 0.02  |
| Antihypertensive medication in the last 2 weeks (reference: no)         |                          |                 |       |                        |                 |       |
| Yes                                                                     | -0.19                    | 0.83(0.76,0.91) | <0.01 | -0.07                  | 0.93(0.82,1.05) | 0.23  |
| Number of risk factors                                                  | 0.08                     | 1.08(1.04,1.12) | <0.01 | 0.10                   | 1.10(1.05,1.16) | <0.01 |

a: Blood pressure level: level 1 (SBP < 120 mmHg and DBP < 80 mmHg); level 2 (SBP: 120-129 mmHg and/or DBP: 80-84 mmHg); level 3 (SBP: 130-139 mmHg and/or DBP: 85-89 mmHg); level 4 (SBP: 140-159 mmHg and/or DBP: 90-99 mmHg); level 5 (SBP: 160-179 mmHg and/or DBP: 100-109 mmHg); level 6 (SBP > 180 mmHg and/or DBP > 110 mmHg)

b: Based on the exchange rate of 6.70 Chinese Yuan Renminbi per US dollar that was in effect on 30 September 2010.

Table continued.

|                                                                         | ≥level 4 BP <sup>a</sup> |                 |       | ≥level 3 BP            |                 |       |
|-------------------------------------------------------------------------|--------------------------|-----------------|-------|------------------------|-----------------|-------|
|                                                                         | Regression coefficient   | OR (%95 CI)     | P     | Regression coefficient | OR (%95 CI)     | P     |
| Women Education (reference: Illiterate or semi-illiterate)              |                          |                 |       |                        |                 |       |
| College graduate or above                                               | -0.74                    | 0.48(0.40,0.58) | <0.01 | -0.78                  | 0.46(0.37,0.57) | <0.01 |
| Senior high school graduate or some college                             | -0.30                    | 0.74(0.66,0.83) | <0.01 | -0.39                  | 0.68(0.59,0.78) | <0.01 |
| Junior high school graduate or some senior high school                  | -0.16                    | 0.85(0.78,0.93) | <0.01 | -0.16                  | 0.85(0.75,0.96) | <0.01 |
| Primary school graduate or some junior high school                      | -0.07                    | 0.93(0.85,1.02) | 0.10  | -0.09                  | 0.92(0.81,1.03) | 0.15  |
| Marital status (reference: single)                                      |                          |                 |       |                        |                 |       |
| Married or cohabiting                                                   | 0.01                     | 1.01(0.64,1.57) | 0.98  | -0.21                  | 0.81(0.43,1.50) | 0.50  |
| Separated/divorced/widowed/others                                       | -0.01                    | 0.99(0.63,1.55) | 0.95  | -0.25                  | 0.78(0.41,1.45) | 0.43  |
| Age (reference: 18-24 years)                                            |                          |                 |       |                        |                 |       |
| 35-44 years                                                             | -0.17                    | 0.85(0.62,1.16) | 0.30  | -0.23                  | 0.79(0.54,1.16) | 0.24  |
| 45-54 years                                                             | -0.03                    | 0.97(0.72,1.31) | 0.85  | 0.04                   | 1.04(0.73,1.50) | 0.82  |
| 55-64 years                                                             | -0.03                    | 0.97(0.72,1.30) | 0.83  | 0.11                   | 1.12(0.78,1.60) | 0.55  |
| 65-74 years                                                             | 0.11                     | 1.12(0.83,1.51) | 0.46  | 0.16                   | 1.18(0.82,1.70) | 0.38  |
| 75+ years                                                               | 0.18                     | 1.20(0.87,1.64) | 0.26  | 0.12                   | 1.13(0.77,1.65) | 0.55  |
| Location (reference: rural areas)                                       |                          |                 |       |                        |                 |       |
| Urban areas                                                             | -0.25                    | 0.78(0.72,0.83) | <0.01 | -0.22                  | 0.80(0.73,0.88) | <0.01 |
| Annual per capita household income (reference: >5372 US\$) <sup>b</sup> |                          |                 |       |                        |                 |       |
| Don't know/not sure/refused                                             | 0.20                     | 1.22(1.10,1.34) | <0.01 | 0.23                   | 1.26(1.11,1.43) | <0.01 |
| < 895                                                                   | 0.21                     | 1.23(1.10,1.37) | <0.01 | 0.13                   | 1.14(0.99,1.32) | 0.06  |
| 895-1789                                                                | 0.26                     | 1.30(1.15,1.47) | <0.01 | 0.22                   | 1.25(1.07,1.46) | <0.01 |
| 1790-5372                                                               | 0.16                     | 1.17(1.06,1.29) | <0.01 | 0.12                   | 1.13(0.99,1.28) | 0.07  |
| Antihypertensive medication in the last 2 weeks (reference: no)         |                          |                 |       |                        |                 |       |
| Yes                                                                     | -0.02                    | 0.98(0.90,1.06) | 0.59  | 0.08                   | 1.08(0.97,1.20) | 0.14  |
| Number of risk factors                                                  | 0.13                     | 1.14(1.10,1.19) | <0.01 | 0.16                   | 1.20(1.14,1.27) | <0.01 |

a: Blood pressure level: level 1 (SBP < 120 mmHg and DBP < 80 mmHg); level 2 (SBP: 120-129 mmHg and/or DBP: 80-84 mmHg); level 3 (SBP: 130-139 mmHg and/or DBP: 85-89 mmHg); level 4 (SBP: 140-159 mmHg and/or DBP: 90-99 mmHg); level 5 (SBP: 160-179 mmHg and/or DBP: 100-109 mmHg); level 6 (SBP > 180 mmHg and/or DBP > 110 mmHg)

b: Based on the exchange rate of 6.70 Chinese Yuan Renminbi per US dollar that was in effect on 30 September 2010.

Table continued

|                        |                                                                         | ≥level 2 BP <sup>a</sup> |                 |       |
|------------------------|-------------------------------------------------------------------------|--------------------------|-----------------|-------|
|                        |                                                                         | Regression coefficient   | OR (%95 CI)     | P     |
| Men                    | Education (reference: Illiterate or semi-illiterate)                    |                          |                 |       |
|                        | College graduate or above                                               | 0.07                     | 1.07(0.74,1.55) | 0.72  |
|                        | Senior high school graduate or some college                             | 0.14                     | 1.15(0.86,1.53) | 0.35  |
|                        | Junior high school graduate or some senior high school                  | 0.23                     | 1.26(0.99,1.61) | 0.06  |
|                        | Primary school graduate or some junior high school                      | 0.39                     | 1.48(1.14,1.91) | <0.01 |
|                        | Marital status (reference: single)                                      |                          |                 |       |
|                        | Married or cohabiting                                                   | -0.11                    | 0.90(0.46,1.76) | 0.76  |
|                        | Separated/divorced/widowed/others                                       | -0.13                    | 0.88(0.43,1.79) | 0.71  |
|                        | Age (reference: 18-24 years)                                            |                          |                 |       |
|                        | 35-44 years                                                             | 0.26                     | 1.30(0.71,2.38) | 0.39  |
|                        | 45-54 years                                                             | 0.11                     | 1.11(0.64,1.93) | 0.70  |
|                        | 55-64 years                                                             | 0.04                     | 1.05(0.61,1.80) | 0.87  |
|                        | 65-74 years                                                             | -0.02                    | 0.98(0.56,1.69) | 0.93  |
|                        | 75+ years                                                               | 0.06                     | 1.06(0.58,1.92) | 0.85  |
|                        | Location (reference: rural areas)                                       |                          |                 |       |
|                        | Urban areas                                                             | -0.20                    | 0.82(0.67,0.99) | 0.04  |
|                        | Annual per capita household income (reference: >5372 US\$) <sup>b</sup> |                          |                 |       |
|                        | Don't know/not sure/refused                                             | 0.03                     | 1.03(0.80,1.34) | 0.80  |
|                        | < 895                                                                   | -0.29                    | 0.75(0.57,0.98) | 0.04  |
|                        | 895-1789                                                                | 0.16                     | 1.18(0.85,1.63) | 0.33  |
|                        | 1790-5372                                                               | 0.02                     | 1.02(0.79,1.32) | 0.87  |
|                        | Antihypertensive medication in the last 2 weeks (reference: no)         |                          |                 |       |
| Yes                    | 0.16                                                                    | 1.17(0.97,1.42)          | 0.10            |       |
| Number of risk factors | 0.12                                                                    | 1.13(1.04,1.23)          | <0.01           |       |

a: Blood pressure level: level 1 (SBP < 120 mmHg and DBP < 80 mmHg); level 2 (SBP: 120-129 mmHg and/or DBP: 80-84 mmHg); level 3 (SBP: 130-139 mmHg and/or DBP: 85-89 mmHg); level 4 (SBP: 140-159 mmHg and/or DBP: 90-99 mmHg); level 5 (SBP: 160-179 mmHg and/or DBP: 100-109 mmHg); level 6 (SBP > 180 mmHg and/or DBP > 110 mmHg)

b: Based on the exchange rate of 6.70 Chinese Yuan Renminbi per US dollar that was in effect on 30 September 2010.

Table continued

|       |                                                                         | ≥ level 2 BP <sup>a</sup> |                 |       |
|-------|-------------------------------------------------------------------------|---------------------------|-----------------|-------|
|       |                                                                         | Regression coefficient    | OR (%95 CI)     | P     |
| Women | Education (reference: Illiterate or semi-illiterate)                    |                           |                 |       |
|       | College graduate or above                                               | -0.55                     | 0.58(0.41,0.81) | <0.01 |
|       | Senior high school graduate or some college                             | -0.30                     | 0.74(0.59,0.94) | <0.01 |
|       | Junior high school graduate or some senior high school                  | -0.13                     | 0.88(0.73,1.07) | 0.20  |
|       | Primary school graduate or some junior high school                      | -0.07                     | 0.94(0.77,1.13) | 0.50  |
|       | Marital status (reference: single)                                      |                           |                 |       |
|       | Married or cohabiting                                                   | -0.12                     | 0.89(0.31,2.51) | <0.01 |
|       | Separated/divorced/widowed/others                                       | -0.12                     | 0.89(0.31,2.55) | <0.01 |
|       | Age (reference: 18-24 years)                                            |                           |                 |       |
|       | 35-44 years                                                             | -0.20                     | 0.81(0.49,1.34) | 0.42  |
|       | 45-54 years                                                             | 0.31                      | 1.36(0.85,2.19) | 0.20  |
|       | 55-64 years                                                             | 0.48                      | 1.61(1.00,2.59) | 0.05  |
|       | 65-74 years                                                             | 0.37                      | 1.45(0.89,2.36) | 0.14  |
|       | 75+ years                                                               | 0.44                      | 1.55(0.91,2.62) | 0.10  |
|       | Location (reference: rural areas)                                       |                           |                 |       |
|       | Urban areas                                                             | -0.22                     | 0.80(0.68,0.94) | 0.01  |
|       | Annual per capita household income (reference: >5372 US\$) <sup>b</sup> |                           |                 |       |
|       | Don't know/not sure/refused                                             | 0.26                      | 1.29(1.06,1.58) | 0.01  |
|       | < 895                                                                   | 0.11                      | 1.12(0.89,1.40) | 0.33  |
|       | 895-1789                                                                | 0.29                      | 1.34(1.04,1.73) | 0.02  |
|       | 1790-5372                                                               | 0.16                      | 1.17(0.96,1.43) | 0.13  |
|       | Antihypertensive medication in the last 2 weeks (reference: no)         |                           |                 |       |
|       | Yes                                                                     | 0.31                      | 1.37(1.16,1.60) | <0.01 |
|       | Number of risk factors                                                  | 0.16                      | 1.17(1.08,1.28) | <0.01 |

a: Blood pressure level: level 1 (SBP < 120 mmHg and DBP < 80 mmHg); level 2 (SBP: 120-129 mmHg and/or DBP: 80-84 mmHg); level 3 (SBP: 130-139 mmHg and/or DBP: 85-89 mmHg); level 4 (SBP: 140-159 mmHg and/or DBP: 90-99 mmHg); level 5 (SBP: 160-179 mmHg and/or DBP: 100-109 mmHg); level 6 (SBP > 180 mmHg and/or DBP > 110 mmHg)

b: Based on the exchange rate of 6.70 Chinese Yuan Renminbi per US dollar that was in effect on 30 September 2010.
